# Supplementary material for: Flood hazard in Afghanistan is intensified both by natural and socioeconomic factors
Source: Copernicus journal article supplement (doi:10.5194/egusphere-2025-1426), 2025-04-29
Supplement: Supplementary file 1 [file Supplementary Table_270325.pdf › Supplemetary/Supplementary Table_270325.pdf]

# Flood hazard in Afghanistan is intensified both by natural and socioeconomic factors

Qutbudin Ishanch<sup>1\*</sup>, Kanchan Mishra<sup>1\*</sup>, Christiane Zarfl<sup>1</sup>, Kathryn E. Fitzsimmons<sup>1,2</sup>

<sup>1</sup>Department of Geosciences, Eberhard Karls University of Tübingen, Schnarrenbergstraße 94-96, 72076 Tübingen, Germany

<sup>2</sup>School of Earth, Atmosphere and Environment, Monash University, 9 Rainforest Walk, Clayton VIC 3800, Australia

*\*Corresponding authors:* Qutbudin Ishanch ([qutbudin.ishanch@sedgeo.uni-tuebingen.de](mailto:qutbudin.ishanch@sedgeo.uni-tuebingen.de)); Kanchan Mishra ([kanchan.mishra@uni-tuebingen.de](mailto:kanchan.mishra@uni-tuebingen.de))

Table S1. Calculation of relative importance weightage (RIW) for level 2 decision indicators used for the FHI index map a) Stream frequency, b) drainage density, c) Basin relief, d) Drainage texture, e) Infiltration number, f) Compactness coefficient.

|                         |               |               |               |               |             |       |       |
|-------------------------|---------------|---------------|---------------|---------------|-------------|-------|-------|
| a) Stream frequency     |               |               |               |               |             |       |       |
| Decision indicators     | 0.002 - 0.005 | 0.005 - 0.006 | 0.006 - 0.008 | 0.008 - 0.009 | 0.009- 0.01 | EEV   | RIW   |
| 0.002- 0.005            | 1             | 1/2           | 1/2           | 1/3           | 1/3         | 0.488 | 0.085 |
| 0.005- 0.006            | 2             | 1             | 1/2           | 1/2           | 1/3         | 0.699 | 0.121 |
| 0.006- 0.008            | 2             | 2             | 1             | 1/2           | 1/3         | 0.922 | 0.160 |
| 0.008 - 0.009           | 3             | 2             | 2             | 1             | 1/2         | 1.431 | 0.248 |
| 0.009 - 0.01            | 3             | 3             | 3             | 2             | 1           | 2.221 | 0.385 |
| b) Drainage Density     |               |               |               |               |             |       |       |
| Decision indicators     | 0.01 - 0.04   | 0.04 - 0.07   | 0.07 - 0.09   | 0.09 - 0.11   | 0.11 - 0.15 | EEV   | RIW   |
| 0.01 - 0.04             | 1             | 1/2           | 1/3           | 1/3           | 1/4         | 0.43  | 0.071 |
| 0.04- 0.07              | 2             | 1             | 1/2           | 1/3           | 1/3         | 0.64  | 0.108 |
| 0.07 - 0.09             | 3             | 2             | 1             | 1/2           | 1/3         | 1.00  | 0.167 |
| 0.09 - 0.11             | 3             | 3             | 2             | 1             | 1/2         | 1.55  | 0.260 |
| 0.11 - 0.15             | 4             | 3             | 3             | 2             | 1           | 2.35  | 0.394 |
| c) Basin Relief (in km) |               |               |               |               |             |       |       |
| Decision indicators     | 0.4 - 1.3     | 1.3- 2.6      | 2.6 - 3.9     | 3.9 - 5.4     | 5.4 - 7.1   | EEV   | RIW   |
| 0.4 - 1.3               | 1             | 1/2           | 1/3           | 1/5           | 1/5         | 0.37  | 0.06  |
| 1.3- 2.6                | 2             | 1             | 1/2           | 1/3           | 1/3         | 0.64  | 0.10  |
| 2.6 - 3.9               | 3             | 2             | 1             | 1/2           | 1/3         | 1.00  | 0.16  |
| 3.9 - 5.4               | 5             | 3             | 2             | 1             | 1/2         | 1.72  | 0.28  |
| 5.4 - 7.1               | 5             | 3             | 3             | 2             | 1           | 2.46  | 0.40  |
| d) Drainage Texture     |               |               |               |               |             |       |       |
| Decision indicators     | 0.02 - 0.05   | 0.05 - 0.08   | 0.08 - 0.1    | 0.1 - 0.14    | 0.14 - 0.18 | EEV   | RIW   |
| 0.02 - 0.05             | 1             | 1/2           | 1/3           | 1/3           | 1/4         | 0.43  | 0.07  |
| 0.05 - 0.08             | 2             | 1             | 1/2           | 1/3           | 1/3         | 0.64  | 0.11  |
| 0.08 - 0.1              | 3             | 2             | 1             | 1/2           | 1/2         | 1.08  | 0.18  |
| 0.1 - 0.14              | 3             | 3             | 2             | 1             | 1/2         | 1.55  | 0.26  |
| 0.14 - 0.18             | 4             | 3             | 2             | 2             | 1           | 2.17  | 0.37  |

|                            |                  |                 |                 |                 |                 |      |      |
|----------------------------|------------------|-----------------|-----------------|-----------------|-----------------|------|------|
| e) Infiltration Number     |                  |                 |                 |                 |                 |      |      |
| Decision indicators        | 0.00003 – 0.0005 | 0.0005 – 0.0007 | 0.0007 – 0.0008 | 0.0008 – 0.0010 | 0.0010 – 0.0014 | EEV  | RIW  |
| 0.00003 - 0.0005           | 1                | 1/2             | 1/2             | 1/2             | 1/3             | 0.53 | 0.10 |
| 0.0005 - 0.0007            | 2                | 1               | 1/2             | 1/2             | 1/2             | 0.76 | 0.14 |
| 0.0007 - 0.0008            | 2                | 2               | 1               | 1/2             | 1/2             | 1.00 | 0.18 |
| 0.0008 - 0.0010            | 2                | 2               | 2               | 1               | 1/2             | 1.32 | 0.24 |
| 0.0010- 0.0014             | 3                | 2               | 2               | 2               | 1               | 1.89 | 0.34 |
| f) Compactness Coefficient |                  |                 |                 |                 |                 |      |      |
| Decision indicators        | 2.2 - 2.3        | 2.3 - 2.5       | 2.5 - 2.9       | 2.9 - 3.5       | 3.5 - 4.4       | EEV  | RIW  |
| 2.2 - 2.3                  | 1                | 2               | 2               | 3               | 4               | 1.86 | 0.38 |
| 2.3 - 2.5                  | 1/2              | 1               | 2               | 3               | 3               | 1.32 | 0.27 |
| 2.5 - 2.9                  | 1/2              | 1/2             | 1               | 2               | 3               | 0.84 | 0.17 |
| 2.9 - 3.5                  | 1/3              | 1/3             | 1/2             | 1               | 2               | 0.49 | 0.10 |
| 3.5 - 4.4                  | 1/4              | 1/3             | 1/3             | 1/2             | 1               | 0.34 | 0.07 |

Table S2. Calculation of relative importance weightage (RIW) for level 2 decision indicators for the FHI index map a) Circulatory ratio, b) Elongation ratio, c) Ruggedness number, d) Bifurcation Ratio, e) Length of overland flow, f) Form factor

|                      |             |             |               |             |             |      |      |
|----------------------|-------------|-------------|---------------|-------------|-------------|------|------|
| a) Circulatory Ratio |             |             |               |             |             |      |      |
| Decision indicators  | 0.05 - 0.08 | 0.08 - 0.10 | 0.10- 0.14    | 0.14- 0.16  | 0.16 - 0.20 | EEV  | RIW  |
| 0.05 - 0.08          | 1           | 1/2         | 1/3           | 1/4         | 1/5         | 0.38 | 0.06 |
| 0.08 - 0.10          | 2           | 1           | 1/2           | 1/3         | 1/4         | 0.61 | 0.10 |
| 0.10- 0.14           | 3           | 2           | 1             | 1/2         | 1/3         | 1.00 | 0.16 |
| 0.14- 0.16           | 4           | 3           | 2             | 1           | 1/2         | 1.64 | 0.26 |
| 0.16- 0.20           | 5           | 4           | 3             | 2           | 1           | 2.61 | 0.42 |
| b) Elongation Ratio  |             |             |               |             |             |      |      |
| Decision indicators  | 0.02 - 0.03 | 0.03 - 0.05 | 0.05- 0.06    | 0.06 - 0.07 | 0.07 - 0.16 | EEV  | RIW  |
| 0.02- 0.03           | 1           | 2           | 2             | 3           | 5           | 2.27 | 0.39 |
| 0.03- 0.05           | 1/2         | 1           | 2             | 2           | 3           | 1.43 | 0.24 |
| 0.05- 0.06           | 1/2         | 1/2         | 1             | 2           | 3           | 1.08 | 0.18 |
| 0.06- 0.07           | 1/3         | 1/2         | 1/2           | 1           | 2           | 0.70 | 0.12 |
| 0.07 - 0.16          | 1/5         | 1/3         | 1/3           | 1/2         | 1           | 0.41 | 0.07 |
| c) Ruggedness number |             |             |               |             |             |      |      |
| Decision indicators  | 0.02 - 0.12 | 0.12 - 0.21 | 0.21 - 0.32   | 0.32 - 0.44 | 0.44 - 0.62 | EEV  | RIW  |
| 0.02 - 0.12          | 1           | 1/2         | 1/2           | 1/3         | 1/3         | 0.49 | 0.09 |
| 0.12 - 0.21          | 2           | 1           | 1/2           | 1/2         | 1/3         | 0.70 | 0.12 |
| 0.21 - 0.32          | 2           | 2           | 1             | 1/2         | 1/2         | 1.00 | 0.18 |
| 0.32 - 0.44          | 3           | 2           | 2             | 1           | 1/2         | 1.43 | 0.25 |
| 0.44 - 0.62          | 3           | 3           | 2             | 2           | 1           | 2.05 | 0.36 |
| d) Bifurcation Ratio |             |             |               |             |             |      |      |
| Decision indicators  | 1.12 - 1.59 | 1.59 - 2.06 | 2.061 - 2.837 | 2.83 - 4.56 | 4.56 - 7.70 | EEV  | RIW  |

|                            |             |             |             |              |               |       |       |
|----------------------------|-------------|-------------|-------------|--------------|---------------|-------|-------|
| 1.12 - 1.594               | 1           | 1/2         | 1/3         | 1/4          | 1/5           | 0.452 | 0.056 |
| 1.594 - 2.061              | 2           | 1           | 1/2         | 1/3          | 1/4           | 0.760 | 0.094 |
| 2.061 - 2.837              | 3           | 2           | 1           | 1/2          | 1/3           | 1.316 | 0.163 |
| 2.837 - 4.562              | 4           | 3           | 2           | 1            | 1/2           | 2.213 | 0.275 |
| 4.562 - 7.70               | 5           | 4           | 3           | 2            | 1             | 3.310 | 0.411 |
| e) Length of overland flow |             |             |             |              |               |       |       |
| Decision indicators        | 3.20 - 4.91 | 4.91 - 5.99 | 5.99- 7.83  | 7.83- 12.110 | 12.11 - 30.74 | EEV   | RIW   |
| 3.20 - 4.91                | 1           | 2           | 3           | 5            | 5             | 2.72  | 0.43  |
| 4.91 - 5.99                | 1/2         | 1           | 2           | 3            | 4             | 1.64  | 0.26  |
| 5.99 - 7.83                | 1/3         | 1/2         | 1           | 3            | 3             | 1.08  | 0.17  |
| 7.83- 12.11                | 1/5         | 1/3         | 1/3         | 1            | 3             | 0.58  | 0.09  |
| 12.11- 30.74               | 1/5         | 1/4         | 1/3         | 1/3          | 1             | 0.35  | 0.06  |
| f) Form factor             |             |             |             |              |               |       |       |
| Decision indicators        | 0.11 - 0.17 | 0.17 - 0.28 | 0.28 - 0.49 | 0.49 - 0.76  | 0.76 - 1.64   | EEV   | RIW   |
| 0.11 - 0.17                | 1           | 1/2         | 1/2         | 1/3          | 1/3           | 0.49  | 0.09  |
| 0.17 - 0.28                | 2           | 1           | 1/2         | 1/2          | 1/3           | 0.70  | 0.12  |
| 0.28 - 0.49                | 2           | 2           | 1           | 1/2          | 1/2           | 1.00  | 0.18  |
| 0.49 - 0.76                | 3           | 2           | 2           | 1            | 1/2           | 1.43  | 0.25  |
| 0.76 - 1.64                | 3           | 3           | 2           | 2            | 1             | 2.05  | 0.36  |

15 Table S3. Calculation of relative importance weightage (RIW) for level 2 decision indicators of Precipitation (mm) for the FHI index.

|                     |      |       |       |       |       |       |       |
|---------------------|------|-------|-------|-------|-------|-------|-------|
| Decision indicators | 3-14 | 15-28 | 29-45 | 46-67 | 68-98 | EEV   | RIW   |
| 3-14                | 1    | 1/2   | 1/2   | 1/3   | 1/4   | 0.461 | 0.076 |
| 15-28               | 2    | 1     | 1/2   | 1/3   | 1/4   | 0.608 | 0.101 |
| 29-45               | 2    | 2     | 1     | 1/2   | 1/3   | 0.922 | 0.153 |
| 46-67               | 3    | 3     | 2     | 1     | 1/2   | 1.552 | 0.257 |
| 68-98               | 4    | 4     | 3     | 2     | 1     | 2.491 | 0.413 |

20 Table S4. Calculation of relative importance weightage (RIW) for level 2 decision indicators for the FVI index map flood vulnerability of the Afghanistan region (a) population density, (b) Rural population density, (d) Literacy rate, (e) Female literacy, f) Basic health centres

|                             |      |       |        |         |          |      |      |
|-----------------------------|------|-------|--------|---------|----------|------|------|
| a) Population density       |      |       |        |         |          |      |      |
| Decision indicators         | 4-17 | 17-44 | 44-106 | 106-247 | 247-1074 | EEV  | RIW  |
| 4-17                        | 1    | 1/2   | 1/3    | 1/5     | 1/7      | 0.34 | 0.05 |
| 17-44                       | 2    | 1     | 1/2    | 1/3     | 1/4      | 0.61 | 0.09 |
| 44-106                      | 3    | 2     | 1      | 1/2     | 1/3      | 1.00 | 0.15 |
| 106-247                     | 5    | 3     | 2      | 1       | 1/2      | 1.72 | 0.27 |
| 247-1074                    | 7    | 4     | 3      | 2       | 1        | 2.79 | 0.43 |
| b) Rural population density |      |       |        |         |          |      |      |
| Decision indicators         | 3-17 | 18-34 | 35-62  | 63-119  | 120-246  | EEV  | RIW  |
| 3-17                        | 1    | 1/2   | 1/2    | 1/3     | 1/3      | 0.49 | 0.09 |

|                                    |             |             |             |             |              |      |      |
|------------------------------------|-------------|-------------|-------------|-------------|--------------|------|------|
| 18-34                              | 2           | 1           | 1/2         | 1/2         | 1/3          | 0.70 | 0.12 |
| 35-62                              | 2           | 2           | 1           | 1/2         | 1/2          | 1.00 | 0.18 |
| 63-119                             | 3           | 2           | 2           | 1           | 1/2          | 1.43 | 0.25 |
| 120-246                            | 3           | 3           | 2           | 2           | 1            | 2.05 | 0.36 |
| c) Literacy rate                   |             |             |             |             |              |      |      |
| Decision indicators                | 15.8 - 19.9 | 20.0 - 28.1 | 28.2 - 33.4 | 33.5 - 39.3 | 39.4 - 55.3  | EEV  | RIW  |
| 15.8 - 19.9                        | 1           | 2           | 4           | 5           | 7            | 3.09 | 0.45 |
| 20.0 - 28.1                        | 1/2         | 1           | 2           | 4           | 6            | 1.89 | 0.28 |
| 28.2 - 33.4                        | 1/4         | 1/2         | 1           | 2           | 4            | 1.00 | 0.15 |
| 33.5 - 39.3                        | 1/5         | 1/4         | 1/2         | 1           | 3            | 0.60 | 0.09 |
| 39.4 - 55.3                        | 1/7         | 1/6         | 1/4         | 1/3         | 1            | 0.29 | 0.04 |
| d) Female literacy                 |             |             |             |             |              |      |      |
| Decision indicators                | 1.5 - 3.8   | 3.8 - 6.9   | 6.9 - 16.1  | 16.1 - 21.6 | 21.6 - 40.9  | EEV  | (RIW |
| 1.5 - 3.8                          | 1           | 2           | 3           | 3           | 5            | 2.46 | 0.40 |
| 3.8 - 6.9                          | 1/2         | 1           | 2           | 3           | 4            | 1.64 | 0.27 |
| 6.9 - 16.1                         | 1/3         | 1/2         | 1           | 2           | 3            | 1.00 | 0.16 |
| 16.1 - 21.6                        | 1/3         | 1/3         | 1/2         | 1           | 2            | 0.64 | 0.11 |
| 21.6 - 40.9                        | 1/5         | 1/4         | 1/3         | 1/2         | 1            | 0.38 | 0.06 |
| e) Basic health centres facilities |             |             |             |             |              |      |      |
| Decision indicators                | 19.0 - 36.0 | 36.1 - 52.0 | 52.1 - 70.0 | 70.1 - 84.0 | 84.1 - 133.0 | EEV  | RIW  |
| 19.0 - 36.0                        | 1           | 3           | 3           | 5           | 5            | 2.95 | 0.46 |
| 36.1 - 52.0                        | 1/3         | 1           | 2           | 3           | 3            | 1.43 | 0.22 |
| 52.1 - 70.0                        | 1/3         | 1/2         | 1           | 2           | 3            | 1.00 | 0.16 |
| 70.1 - 84.0                        | 1/5         | 1/3         | 1/2         | 1           | 2            | 0.58 | 0.09 |
| 84.1 - 133.0                       | 1/5         | 1/3         | 1/3         | 1/2         | 1            | 0.41 | 0.06 |

Table S5. Calculation of relative importance weightage (RIW) for level 2 decision indicators for the FVI index map flood vulnerability of the Afghanistan region: a) Safe drinking water, b) Distance to the nearest drivable road, c) Cultivated Area, d) Poverty rate, e) Unemployment rate

|                                          |            |             |             |             |             |      |      |
|------------------------------------------|------------|-------------|-------------|-------------|-------------|------|------|
| a) Safe drinking water                   |            |             |             |             |             |      |      |
| Decision indicators                      | 9.6 - 23.5 | 23.5 - 39.4 | 39.4 - 55.6 | 55.6 - 68.5 | 68.5 - 93.7 | EEV  | RIW  |
| 9.6 - 29.7                               | 1          | 2           | 3           | 3           | 4           | 2.35 | 0.40 |
| 29.8 - 49.1                              | 1/2        | 1           | 2           | 2           | 3           | 1.43 | 0.24 |
| 49.2 - 62.6                              | 1/3        | 1/2         | 1           | 2           | 2           | 0.92 | 0.16 |
| 62.7 - 77.5                              | 1/3        | 1/2         | 1/2         | 1           | 2           | 0.70 | 0.12 |
| 77.6 - 93.7                              | 1/4        | 1/3         | 1/2         | 1/2         | 1           | 0.46 | 0.08 |
| b) Distance to the nearest drivable road |            |             |             |             |             |      |      |
| Decision indicators                      | 0.1 - 1.7  | 1.7 - 3.5   | 3.5 - 6.7   | 6.7 - 10.9  | 10.9 - 24.9 | EEV  | RIW  |
| 0.1 - 1.7                                | 1          | 1/2         | 1/3         | 1/5         | 1/7         | 0.34 | 0.05 |
| 1.7 - 3.5                                | 2          | 1           | 1/2         | 1/4         | 1/6         | 0.53 | 0.08 |
| 3.5 - 6.7                                | 3          | 2           | 1           | 1/2         | 1/3         | 1.00 | 0.15 |
| 6.7 - 10.9                               | 5          | 4           | 2           | 1           | 1/3         | 1.68 | 0.25 |
| 10.9 - 24.9                              | 7          | 6           | 3           | 3           | 1           | 3.28 | 0.48 |

|                      |             |             |             |             |             |      |      |
|----------------------|-------------|-------------|-------------|-------------|-------------|------|------|
| c) Cultivated Area   |             |             |             |             |             |      |      |
| Decision indicators  | 0.8 - 4.2   | 4.2 - 8.2   | 8.2 - 18.9  | 18.9 - 33.4 | 33.4 - 51.6 | EEV  | RIW  |
| 0.8 - 4.2            | 1           | 1/2         | 1/3         | 1/5         | 1/7         | 0.34 | 0.05 |
| 4.2 - 8.2            | 2           | 1           | 1/2         | 1/3         | 1/5         | 0.58 | 0.09 |
| 8.2 - 18.9           | 3           | 2           | 1           | 1/3         | 1/3         | 0.92 | 0.14 |
| 18.9 - 33.4          | 5           | 3           | 3           | 1           | 1/3         | 1.72 | 0.26 |
| 33.4 - 51.6          | 7           | 5           | 3           | 3           | 1           | 3.16 | 0.47 |
| d) Poverty rate      |             |             |             |             |             |      |      |
| Decision indicators  | 12.8 - 34.3 | 34.4 - 50.7 | 50.8 - 61.8 | 61.9 - 76.5 | 76.6 - 90.2 | EEV  | RIW  |
| 12.8 - 34.3          | 1           | 1/3         | 1/5         | 1/7         | 1/7         | 0.27 | 0.04 |
| 34.4 - 50.7          | 3           | 1           | 1/3         | 1/4         | 1/5         | 0.55 | 0.08 |
| 50.8 - 61.8          | 5           | 3           | 1           | 1/3         | 1/4         | 1.05 | 0.15 |
| 61.9 - 76.5          | 7           | 4           | 3           | 1           | 1/2         | 2.11 | 0.30 |
| 76.6 - 90.2          | 7           | 5           | 4           | 2           | 1           | 3.09 | 0.44 |
| e) Unemployment rate |             |             |             |             |             |      |      |
| Decision indicators  | 10.6 - 13.8 | 13.8 - 18.3 | 18.3 - 25.3 | 25.3 - 33.3 | 33.3 - 46.4 | EEV  | RIW  |
| 10.6 - 13.8          | 1           | 1/2         | 1/2         | 1/3         | 1/3         | 0.49 | 0.09 |
| 13.8 - 18.3          | 2           | 1           | 1/2         | 1/2         | 1/3         | 0.70 | 0.12 |
| 18.3 - 25.3          | 2           | 2           | 1           | 1/2         | 1/2         | 1.00 | 0.18 |
| 25.3 - 33.3          | 3           | 2           | 2           | 1           | 1/2         | 1.43 | 0.25 |
| 33.3 - 46.4          | 3           | 3           | 2           | 2           | 1           | 2.05 | 0.36 |

Table S6. Landuse and Land cover AHP calculation Land Use and Land Cover: Calculation of relative importance weightage (RIW) for level 2 decision indicators

|                         |                   |                 |                        |                 |                      |                |      |      |
|-------------------------|-------------------|-----------------|------------------------|-----------------|----------------------|----------------|------|------|
| Decision indicators     | Urban or Built Up | Cultivated Land | Water Body / Marshland | Forest or shrub | Barren or Sand cover | Permanent Snow | EEV  | RIW  |
| Urban or Built Up       | 1                 | 2               | 3                      | 5               | 7                    | 7              | 3.37 | 0.39 |
| Cultivated Land         | 1/2               | 1               | 3                      | 5               | 7                    | 7              | 2.68 | 0.31 |
| Water Body or Marshland | 1/3               | 1/3             | 1                      | 2               | 2                    | 2              | 0.98 | 0.11 |
| Forest or shrub         | 1/5               | 1/5             | 1/2                    | 1               | 2                    | 2              | 0.66 | 0.08 |
| Barren or Sand cover    | 1/7               | 2/7             | 1/2                    | 1/2             | 1                    | 2              | 0.52 | 0.06 |
| Permanent Snow          | 1/7               | 1/7             | 1/2                    | 1/2             | 1/2                  | 1              | 0.37 | 0.04 |

30 Table S7. Saaty's scale of preference

|                      |                  |
|----------------------|------------------|
| Intensity importance | Definition       |
| 1                    | Equal importance |

|             |                                        |
|-------------|----------------------------------------|
| 3           | Moderate importance                    |
| 5           | Strong importance                      |
| 7           | Very strong or Demonstrated importance |
| 9           | Extreme importance                     |
| 2,4,6,8     | Intermediate values                    |
| Reciprocals | Inverse comparison                     |

Table S8. Saaty's Random index values

| Number of criteria | Random consistency index |
|--------------------|--------------------------|
| 1                  | 0                        |
| 2                  | 0                        |
| 3                  | 0.58                     |
| 4                  | 0.89                     |
| 5                  | 1.12                     |
| 6                  | 1.24                     |
| 7                  | 1.32                     |
| 8                  | 1.41                     |
| 9                  | 1.45                     |
| 10                 | 1.49                     |
| 11                 | 1.51                     |
| 12                 | 1.54                     |
| 13                 | 1.56                     |
| 14                 | 1.57                     |
| 15                 | 1.59                     |
| 16                 | 1.60                     |

35 Table S9: Summary table of governing factors characterizing flood risks zones at subbasin/province level.

| Flood Risk Zones                       | Very High                                                         | High                                                                            | Moderate                                            | Low                                              |
|----------------------------------------|-------------------------------------------------------------------|---------------------------------------------------------------------------------|-----------------------------------------------------|--------------------------------------------------|
| Covered Area (%)                       | 24                                                                | 22                                                                              | 26                                                  | 28                                               |
| Corresponding subbasin                 | 1, 2, 3, 4, 6, 7, 10,15, 16, 18, 21                               | 5, 8, 9, 11, 12, 23, 25, 27, 28, 30, 40                                         | 13, 14, 17,19, 20, 22, 21, 32, 39, 44, 46, 48, 49   | 24, 26, 33, 34, 35, 36, 37, 38,41, 42, 43, 47,   |
| Corresponding River basins             | Amu and Kabul River basin                                         | Kabul, Northern and Harirud-Morghab                                             | Northern and Hilmand                                | Hilmand and Harirud-Morghab                      |
| Hydro-morphometry governing indicators | high stream frequency, circular basins, higher precipitation, low | longer overland flow paths and significant basin relief within areas with lower | higher drainage density, shorter overland flow, and | higher drainage density, lower overland flow and |

|                                     |                                                                                                                    |                                                                                                                                   |                                                                                                                                                |                                                                       |
|-------------------------------------|--------------------------------------------------------------------------------------------------------------------|-----------------------------------------------------------------------------------------------------------------------------------|------------------------------------------------------------------------------------------------------------------------------------------------|-----------------------------------------------------------------------|
|                                     | compact basin and higher infiltration number                                                                       | drainage density and infiltration numbers                                                                                         | higher infiltration numbers                                                                                                                    | higher infiltration number                                            |
| Socio-economic governing indicators | high population density, significant land use changes, better access to safe drinking water and high poverty rates | Areas with higher population density, including rural populations, better access to safe drinking water, and lower literacy rates | higher rural and overall population density, closer proximity to drivable roads, significant land use changes, and lower female literacy rates | Literate rate, closer to accessible road and lower population density |
