# Supplementary material for: Flood hazard in Afghanistan is intensified both by natural and socioeconomic factors
Source: Copernicus journal article supplement (doi:10.5194/egusphere-2025-1426), 2025-04-29
Supplement: Supplementary file [file egusphere-2025-1426-RC1-supplement.pdf]

## **Review Comments**

1. The title is indicating the outcome of this study, it must be revised.
2. The authors sometimes have indicated the objective as identifying flood risk, sometimes as hazard and sometimes as the vulnerability. This is confusing. It is suggested to fix the objective first.
3. In the background, need clarification of the significance of this study and highlight research gap that should be addressed.
4. Concise the Title of Figure 2.
5. Why have you used rural population density along with population density?
6. You have shown Flood Hazard Index (FHI) map in Figure 3(a) however, justify the purpose and significance of using Classified Flood Hazard Index (FHI) map as shown in Figure 3(b).
7. Requires similar justification for Figure 4 and 5.
8. What do mean by the effects of topography, and drainage characteristics?
9. In the result section you have indicated ‘Our vulnerability assessment indicates that high population density, especially in rural areas, along with significant land use changes, produce the greatest susceptibility to flood risk’
10. In general, the urban area faces frequent landuse change and occupy high population, however your finds differ from this one. Can you please justify.
